# Supplementary material for: IFN-γ-Based ELISpot as a New Tool to Detect Human Infections with Borna Disease Virus 1 (BoDV-1): A Pilot Study
Source: MDPI journal article supplement (doi:10.3390/v15010194), 2023-01-10
Supplement: s1 [file s1]

**Table S3.** Immune history of patients after solid-organ transplantation with focus on BoDV-1 ELISpot outliers (upon stimulation with BoDV-1 N peptides).

| patients after solid-organ transplantation | solid-organ transplantation              | current immuno-suppressive medication                                                                | induction at time of transplantation | ABO-incompatibility     | time since transplantation [years] | history of organ rejection                  | basic medical condition leading to nephropathy |
|--------------------------------------------|------------------------------------------|------------------------------------------------------------------------------------------------------|--------------------------------------|-------------------------|------------------------------------|---------------------------------------------|------------------------------------------------|
| outlier 1<br>(BoDV-1 ELISpot N)            | kidney                                   | MMF (360 mg/d)<br><br>tacrolimus                                                                     | no                                   | no                      | 9                                  | unknown                                     | hypertensive nephropathy                       |
| outlier 2<br>(BoDV-1 ELISpot N)            | kidney                                   | MMF (500 mg/d)<br><br>everolimus                                                                     | no                                   | no                      | 12                                 | unknown                                     | focal segmental glomerulosclerosis             |
| outlier 3<br>(BoDV-1 ELISpot N)            | kidney                                   | MMF (1080 mg/d)<br><br>tacrolimus                                                                    | basiliximab                          | no                      | 5                                  | no                                          | unknown                                        |
| cohort<br>(n = 27)                         | kidney: 93%<br><br>kidney + pancreas: 7% | MMF: 85% (dosage 360-2000 mg/d)<br><br>tacrolimus: 89%<br><br>glucocorticoids: 33%<br><br>others: 7% | yes: 33%<br><br>no: 67%              | yes: 15%<br><br>no: 85% | median: 7<br><br>range: 1-23       | yes: 19%<br><br>no: 30%<br><br>unknown: 52% |                                                |

MMF: mycophenolate mofetil.
