# Supplementary material for: IFN-γ-Based ELISpot as a New Tool to Detect Human Infections with Borna Disease Virus 1 (BoDV-1): A Pilot Study
Source: MDPI journal article supplement (doi:10.3390/v15010194), 2023-01-10
Supplement: s1 [file s1]

| patients with BoDV-1 infection | negative control                                                                   | BoDV-1 N peptide pool                                                               | BoDV-1 X peptide pool                                                                | BoDV-1 P peptide pool                                                                | positive control (PHA)                                                               |
|--------------------------------|------------------------------------------------------------------------------------|-------------------------------------------------------------------------------------|--------------------------------------------------------------------------------------|--------------------------------------------------------------------------------------|--------------------------------------------------------------------------------------|
| patient 1                      |   |   |   |   |   |
| patient 2                      |   |   |   |   |   |
| patient 3                      |  |  |  |  |  |

**Figure S2. BoDV-1 ELISpot pictures.** Unedited pictures as they were collected by an AID iSpot Robot (settings: relative spot intensity  $\geq 25$ , spot size  $\geq 100$  [0.01 mm<sup>2</sup>], gradient  $\geq 10$ ) show peripheral blood mononuclear cell (PBMC) samples of three patients with confirmed BoDV-1 infection

without stimulation (negative control), under stimulation with BoDV-1-protein-derived peptides (N, X and P protein) or stimulated with phytohemagglutinin (PHA; positive control). Per well, 250,000 PBMC were seeded. Patient 2 and 3 were under immunosuppressive treatment at the time of PBMC sampling.
