# Supplementary material for: IFN-γ-Based ELISpot as a New Tool to Detect Human Infections with Borna Disease Virus 1 (BoDV-1): A Pilot Study
Source: MDPI journal article supplement (doi:10.3390/v15010194), 2023-01-10
Supplement: s1 [file s1]

**Table S2.** Excluded samples of patients with BoDV-1 infection. Thawed PBMC samples of patients with BoDV-1 infection (patients 4-7) that did not meet test requirements (viable cell count not sufficient for seeding 250,000 viable PBMC per well) or test criteria ( $\geq 20$  SFU/250,000 PBMC in positive control). These samples were subsequently excluded from analysis.

| patients with BoDV-1 infection | seeded viable PBMC per well | SFU under stimulation with BoDV-1 N peptides * | SFU in positive control (PHA) * |
|--------------------------------|-----------------------------|------------------------------------------------|---------------------------------|
| patient 4                      | 16,000                      | 0 SFU/16,000 PBMC                              | -1 SFU/16,000 PBMC              |
| patient 5                      | 100,000                     | 0 SFU/100,000 PBMC                             | 0 SFU/100,000 PBMC              |
| patient 6                      | 100,000                     | 0 SFU/100,000 PBMC                             | 21 SFU/100,000 PBMC             |
| patient 7                      | 250,000                     | 0 SFU/250,000 PBMC                             | 8 SFU/250,000 PBMC              |

\* Spot forming units (SFU) of peripheral blood mononuclear cells (PBMC) upon stimulation with BoDV-1 N peptides and phytohemagglutinin (PHA; positive control) were corrected for the SFU count of the respective negative control.
