# Supplementary material for: IFN-γ-Based ELISpot as a New Tool to Detect Human Infections with Borna Disease Virus 1 (BoDV-1): A Pilot Study
Source: MDPI journal article supplement (doi:10.3390/v15010194), 2023-01-10
Supplement: s1 [file s1]

**Table S1.** Peptide sequences for BoDV-1 ELISpot.

| BoDV-1 protein                | peptide sequence (15-mer, 11aa overlap)                                                                                                                                                                                                                                                                                                                                                                                                                                                                                                                                                                                                                                                                                                                                                                                                                                                                                           |
|-------------------------------|-----------------------------------------------------------------------------------------------------------------------------------------------------------------------------------------------------------------------------------------------------------------------------------------------------------------------------------------------------------------------------------------------------------------------------------------------------------------------------------------------------------------------------------------------------------------------------------------------------------------------------------------------------------------------------------------------------------------------------------------------------------------------------------------------------------------------------------------------------------------------------------------------------------------------------------|
| BoDV-1 N protein (p40): N → C | MPPKRRLVDDADAME<br>RRLVDDADAMEDQDL<br>DDADAMEDQDLYEPP<br>AMEDQDLYEPPASLP<br>QDLYEPPASLPKLP<br>EPPASLPKLPKFLQ<br>SLPKLPKFLQYTVG<br>LPGKFLQYTVGGSDP<br>FLQYTVGGSDPHPGI<br>TVGGSDPHPGIGHEK<br>SDPHPGIGHEKDIRQ<br>PGIGHEKDIRQNAVA<br>HEKDIRQNAVALDQ<br>IRQNAVALDQSRRD<br>AVALDQSRRDMFHT<br>LDQSRRDMFHTVTPS<br>RRDMFHTVTPSLVFL<br>FHTVTPSLVFLCLI<br>TPSLVFLCLIPGLH<br>VFLCLIPGLHAAFV<br>LLIPGLHAAFVHGGV<br>GLHAAFVHGGVPRES<br>AFVHGGVPRESYLST<br>GGVPRESYLSTPVTR<br>RESYLSTPVTRGEQT<br>LSTPVTRGEQTVVKT<br>VTRGEQTVVKTAKFY<br>EQTVVKTAKFYGEKT<br>VKTAKFYGEKTTQRD<br>KFYGEKTTQRDLTEL<br>EKTTQRDLTELEISS<br>QRDLTELEISSIFSH<br>TELEISSIFSHCCSL<br>ISSIFSHCCSLIGV<br>FSHCCSLIGVVIGS<br>CSLLIGVVIGSSSKI<br>IGVVIGSSSKIKAGA<br>IGSSSKIKAGAEQIK<br>SKIKAGAEQIKKRFK<br>AGAEQIKKRFKTMMA<br>QIKKRFKTMMAALNR<br>RFKTMMAALNRPSHG<br>MMAALNRPSHGETAT<br>LNRPSHGETATLLQM<br>SHGETATLLQMFNPH<br>TATLLQMFNPHEAID<br>LQMFNPHEAIDWING<br>NPHEAIDWINGQPWV |

|                               |                                                                                                                                                                                                                                                                                                                                                                                                                                                                                                                                                                                                                                                                                                                                                                                                                           |
|-------------------------------|---------------------------------------------------------------------------------------------------------------------------------------------------------------------------------------------------------------------------------------------------------------------------------------------------------------------------------------------------------------------------------------------------------------------------------------------------------------------------------------------------------------------------------------------------------------------------------------------------------------------------------------------------------------------------------------------------------------------------------------------------------------------------------------------------------------------------|
|                               | AIDWINGQPWVGSFV<br>INGQPWVGSFVLSLL<br>PWVGSFVLSLLTTDF<br>SFVLSLLTTDFESPG<br>SLLTTDFESPGKEFM<br>TDFESPGKEFMDQIK<br>SPGKEFMDQIKLVAS<br>EFMDQIKLVASYAQM<br>QIKLVASYAQMTTYT<br>VASYAQMTTYTTIKE<br>AQMTTYTTIKEYLAE<br>TYTTIKEYLAECMDA<br>IKEYLAECMDATLT<br>LAECMDATLTIPVVA<br>MDATLTIPVVAYEIR<br>LTIPVVAYEIRDFLE<br>VVAYEIRDFLEVSAK<br>EIRDFLEVSAKLKED<br>FLEVSAKLKEDHADL<br>SAKLKEDHADLFPFL<br>KEDHADLFPFLGAIR<br>ADLFPFLGAIRHPDA<br>PFLGAIRHPDAIKLA<br>AIRHPDAIKLAPRSF<br>PDAIKLAPRSFPNLA<br>KLAPRSFPNLASAAF<br>RSFPNLASAAFYWSK<br>NLASAAFYWSKKENP<br>AAFYWSKKENPTMAG<br>WSKKENPTMAGYRAS<br>ENPTMAGYRASTIQP<br>MAGYRASTIQPGASV<br>RASTIQPGASVKETQ<br>IQPGASVKETQLARY<br>ASVKETQLARYRRRE<br>ETQLARYRRREISRG<br>ARYRRREISRGEDGA<br>RREISRGEDGAELSG<br>SRGEDGAELSGEISA<br>DGAELSGEISAIMKM<br>LSGEISAIMKMIGVT<br>EISAIMKMIGVTGLN |
| BoDV-1 X protein (p10): N → C | MSSDLRLTLELVRR<br>LRLTLELVRRRLNGN<br>LLELVRRRLNGNATIE<br>VRRRLNGNATIESGRL<br>NGNATIESGRLPGGR<br>TIESGRLPGGRRRSP<br>GRLPGGRRRSPDTTT<br>GGRRRSPDTTTGTTG<br>RSPDTTTGTTGVTKT<br>TTTGTTGVTKTEGP<br>TTGVTKTEGPKECI                                                                                                                                                                                                                                                                                                                                                                                                                                                                                                                                                                                                              |

|                               |                                                                                                                                                                                                                                                                                                                                                                                                                                                                                                                                                                                                                                                                                                                                                                                                                                                                                      |
|-------------------------------|--------------------------------------------------------------------------------------------------------------------------------------------------------------------------------------------------------------------------------------------------------------------------------------------------------------------------------------------------------------------------------------------------------------------------------------------------------------------------------------------------------------------------------------------------------------------------------------------------------------------------------------------------------------------------------------------------------------------------------------------------------------------------------------------------------------------------------------------------------------------------------------|
|                               | TKTTEGPKECIDPTS<br>EGPKECIDPSTRPAP<br>ECIDPSTRPAPEGPQ<br>PSTRPAPEGPQEEPL<br>PAPEGPQEEPLHDLR<br>GPQEEPLHDLRPRPA<br>EPLHDLRPRPANRKG<br>DLRPRPANRKGAAVE                                                                                                                                                                                                                                                                                                                                                                                                                                                                                                                                                                                                                                                                                                                                 |
| BoDV-1 P protein (p24): N → C | MATRPSSLVDSLEDE<br>PSSLVDSLEDEEDPQ<br>VDSLEDEEDPQTLRR<br>EDEEDPQTLRRERPG<br>DPQTLRRERPGSPRP<br>LRRERPGSPRPRKVP<br>RPGSPRPRKVPRNAL<br>PRPRKVPRNALTQPV<br>KVPRNALTQPDQLL<br>NALTQPDQLLKDLR<br>QPVDQLLKDLRKNPS<br>QLLKDLRKNPSMISD<br>DLRKNPSMISDPDQR<br>NPSMISDPDQRTGRE<br>ISDPDQRTGREQLSN<br>DQRTGREQLSNDELI<br>GREQLSNDELIKKLV<br>LSNDELIKKLVTELA<br>ELIKKLVTELAENSM<br>KLVTELAENSMIEAE<br>ELAENSMIEAEVVRG<br>NSMIEAEVVRGTLGD<br>EAEVVRGTLGDISAR<br>VRGTLGDISARIEAG<br>LGDISARIEAGFESL<br>SARIEAGFESLSALQ<br>EAGFESLSALQVETI<br>ESLSALQVETIQTAAQ<br>ALQVETIQTAAQRCDH<br>ETIQTAAQRCDHSDSI<br>TAQRCDHSDSIRILG<br>CDHSDSIRILGENIK<br>DSIRILGENIKILDR<br>ILGENIKILDRSMKT<br>NIKILDRSMKTMMET<br>LDRSMKTMMETMKLM<br>MKTMMETMKLMMEKV<br>METMKLMMEKVDLLY<br>KLMMEKVDLLYASTA<br>EKVDLLYASTAVGTS<br>LLYASTAVGTSAPML<br>STAVGTSAPMLPSHP<br>GTSAPMLPSHPAPPR<br>PMLPSHPAPPRIYPQ<br>SHPAPPRIYPQLPSA |

|  |                                                       |
|--|-------------------------------------------------------|
|  | PPRIYPQLPSAPTTD<br>YPQLPSAPTTDEWDI<br>QLPSAPTTDEWDIIP |
|--|-------------------------------------------------------|
